# Supplementary material for: Spatial Distribution of Aedes aegypti Oviposition Temporal Patterns and Their Relationship with Environment and Dengue Incidence
Source: MDPI journal article supplement (doi:10.3390/insects12100919), 2021-10-09
Supplement: s1 [file s1]

# Supplementary Materials: Spatial Distribution of *Aedes aegypti* Oviposition Temporal Patterns and Their Relationship with Environment and Dengue Incidence

Verónica Andreo <sup>1,2,\*</sup> , Ximena Porcasi <sup>1</sup>, Claudio Guzman <sup>3</sup>, Laura Lopez <sup>3</sup> and Carlos M. Scavuzzo <sup>1</sup>

**Table S1.** List of Sentinel 2 scenes used.

| Period    | Date       | Scene name                                                   | Cloud % |
|-----------|------------|--------------------------------------------------------------|---------|
| 2017/2018 | 2017-11-14 | S2B_MSIL1C_20171114T142029_N0206_R010_T20JLL_20171114T185810 | 0.0     |
|           | 2017-12-14 | S2B_MSIL1C_20171214T142029_N0206_R010_T20JLL_20171214T173517 | 0.0     |
|           | 2018-01-15 | S2A_MSIL1C_20180115T141041_N0206_R110_T20JLL_20180115T173441 | 0.0     |
|           | 2018-02-14 | S2A_MSIL1C_20180214T141041_N0206_R110_T20JLL_20180214T203900 | 0.0     |
|           | 2018-03-21 | S2B_MSIL1C_20180321T141039_N0206_R110_T20JLL_20180321T173031 | 0.0     |
| 2018/2019 | 2018-11-14 | S2A_MSIL1C_20181114T142031_N0207_R010_T20JLL_20181114T175244 | 1.0     |
|           | 2018-12-14 | S2A_MSIL1C_20181214T142031_N0207_R010_T20JLL_20181214T173648 | 1.0     |
|           | 2019-01-20 | S2A_MSIL1C_20181214T142031_N0207_R010_T20JLL_20181214T173648 | 5.0     |
|           | 2019-02-14 | S2A_MSIL1C_20181214T142031_N0207_R010_T20JLL_20181214T173648 | 0.0     |
|           | 2019-03-24 | S2A_MSIL1C_20190324T142041_N0207_R010_T20JLL_20190324T205705 | 6.0     |
| 2019/2020 | 2019-11-29 | S2A_MSIL1C_20190324T142041_N0207_R010_T20JLL_20190324T205705 | 9.0     |
|           | 2019-12-09 | S2A_MSIL1C_20191209T141731_N0208_R010_T20JLL_20191209T173854 | 1.0     |
|           | 2020-01-28 | S2A_MSIL1C_20200128T141651_N0208_R010_T20JLL_20200128T173915 | 0.0     |
|           | 2020-02-12 | S2B_MSIL1C_20200212T141649_N0209_R010_T20JLL_20200212T174151 | 7.0     |
|           | 2020-03-20 | S2B_MSIL1C_20200320T141049_N0209_R110_T20JLL_20200320T173058 | 0.0     |

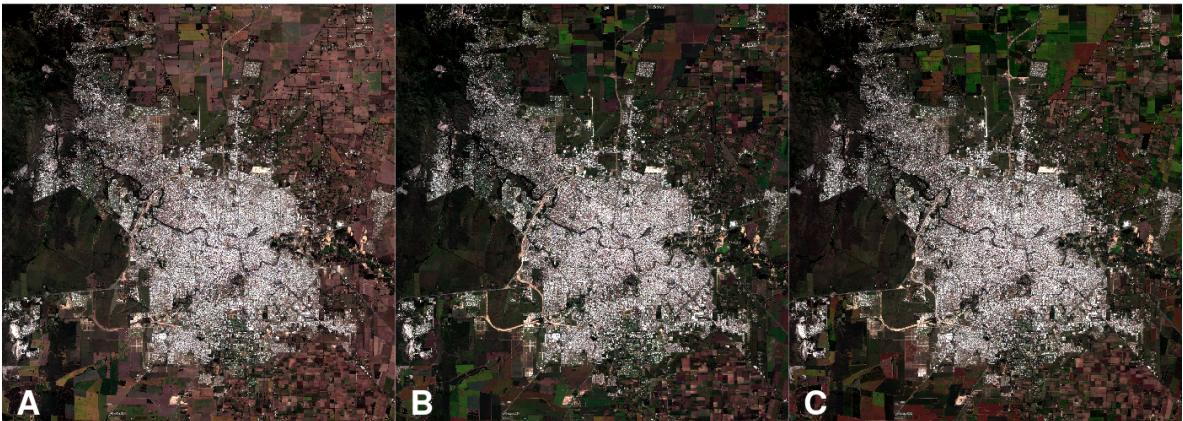

**Figure S1.** Natural color Sentinel 2 band combinations for years 2017-2018 (A), 2018-2019 (B) and 2019-2020 (C) for Córdoba city and surroundings (RBG 4,3,2).

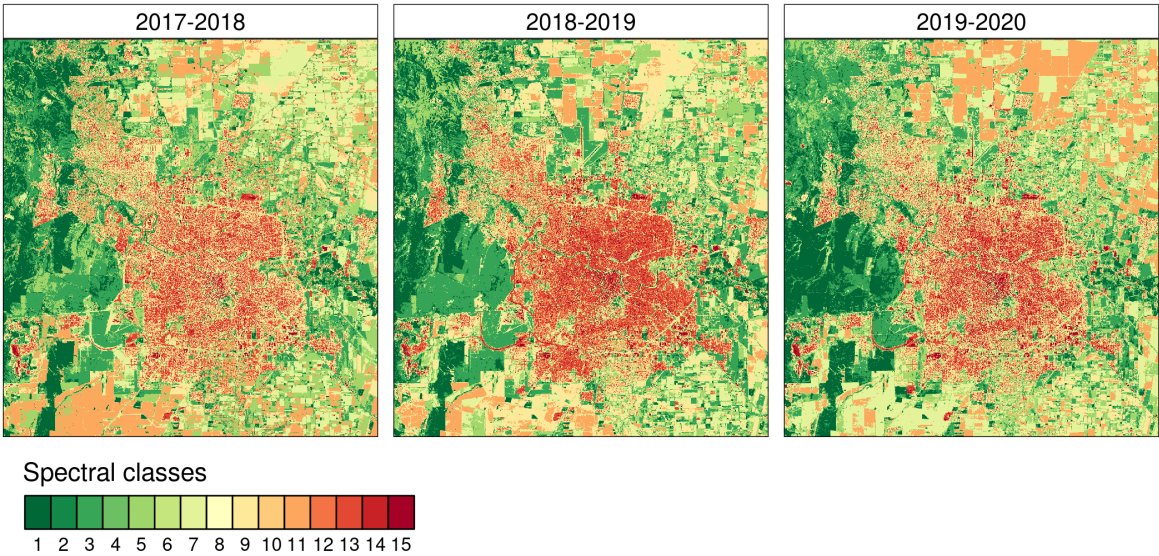

**Figure S2.** Unsupervised classification for years 2017-2018, 2018-2019 and 2019-2020 for Córdoba city and surroundings.

**Table S2.** Variables derived from satellite image analysis used for modeling the cluster type in Córdoba (Argentina).

| Variable                           | Description                                                                                                                 | Example name |
|------------------------------------|-----------------------------------------------------------------------------------------------------------------------------|--------------|
| EVI Average                        | Average of Enhanced Vegetation Index (EVI) in an area of 50 or 100 m radio.                                                 | evi_av_9     |
| EVI Standard Deviation             | Standard deviation of Enhanced Vegetation Index (EVI) in an area of 50 or 100 m radio.                                      | evi_sd_9     |
| LSWI Average                       | Average of Land Surface Water Index (LSWI) in an area of 50 or 100 m radio.                                                 | lswi_av_9    |
| LSWI Standard Deviation            | Standard deviation of Land Surface Water Index (LSWI) in an area of 50 or 100 m radio.                                      | lswi_sd_9    |
| NDBI Average                       | Average of Normalized Difference Built-up Index (NDBI) in an area of 50 or 100 m radio.                                     | ndbi_av_9    |
| NDBI Standard Deviation            | Standard deviation of Normalized Difference Built-up Index (NDBI) in an area of 50 or 100 m radio.                          | ndbi_sd_9    |
| NDVI Average                       | Average of Normalized Difference Vegetation Index (NDVI) in an area of 50 or 100 m radio.                                   | ndvi_av_9    |
| NDVI Standard Deviation            | Standard deviation of Normalized Difference Vegetation Index (NDVI) in an area of 50 or 100 m radio.                        | ndvi_sd_9    |
| NDWI Average (McFeters)            | Average of Normalized Difference Water Index (NDWI) in an area of 50 or 100 m radio.                                        | ndwi_mf_av_9 |
| NDWI Standard Deviation (McFeters) | Standard deviation of Normalized Difference Water Index (NDWI) in an area of 50 or 100 m radio.                             | ndwi_mf_sd_9 |
| NDWI Average (Xu)                  | Average of Normalized Difference Water Index (NDWI) in an area of 50 or 100 m radio.                                        | ndwi_x_av_9  |
| NDWI Standard Deviation (Xu)       | Standard deviation of Normalized Difference Water Index (NDWI) in an area of 50 or 100 m radio.                             | ndwi_x_sd_9  |
| Angular Second Moment (ASM)        | Angular second moment estimated over a synthetic panchromatic band in an area of 50 or 100 m radio.                         | ASM_9        |
| Contrast                           | Contrast estimated over a synthetic panchromatic band in an area of 50 or 100 m radio.                                      | Contr_9      |
| Correlation                        | Correlation estimated over a synthetic panchromatic band in an area of 50 or 100 m radio.                                   | Corr_9       |
| Entropy                            | Entropy estimated over a synthetic panchromatic band in an area of 50 or 100 m radio.                                       | Entr_9       |
| Inverse Difference Moment (IDM)    | Inverse difference moment estimated over a synthetic panchromatic band in an area of 50 or 100 m radio.                     | IDM_9        |
| Richness                           | Number of different land cover classes in an area of 50 or 100 m radio.                                                     | rich_9       |
| Interspersion                      | Proportion of cells belonging to land cover classes different to that of the central pixel in an area of 50 or 100 m radio. | intersp_9    |
| Mode                               | Most common land cover class in an area of 50 or 100 m radio.                                                               | mode_9       |
| Diversity Simpson                  | Simpson diversity index estimated over land cover classes in an area of 50 or 100 m radio.                                  | Simpson_9    |
| Diversity Shannon                  | Shannon diversity index estimated over land cover classes in an area of 50 or 100 m radio.                                  | Shannon_9    |

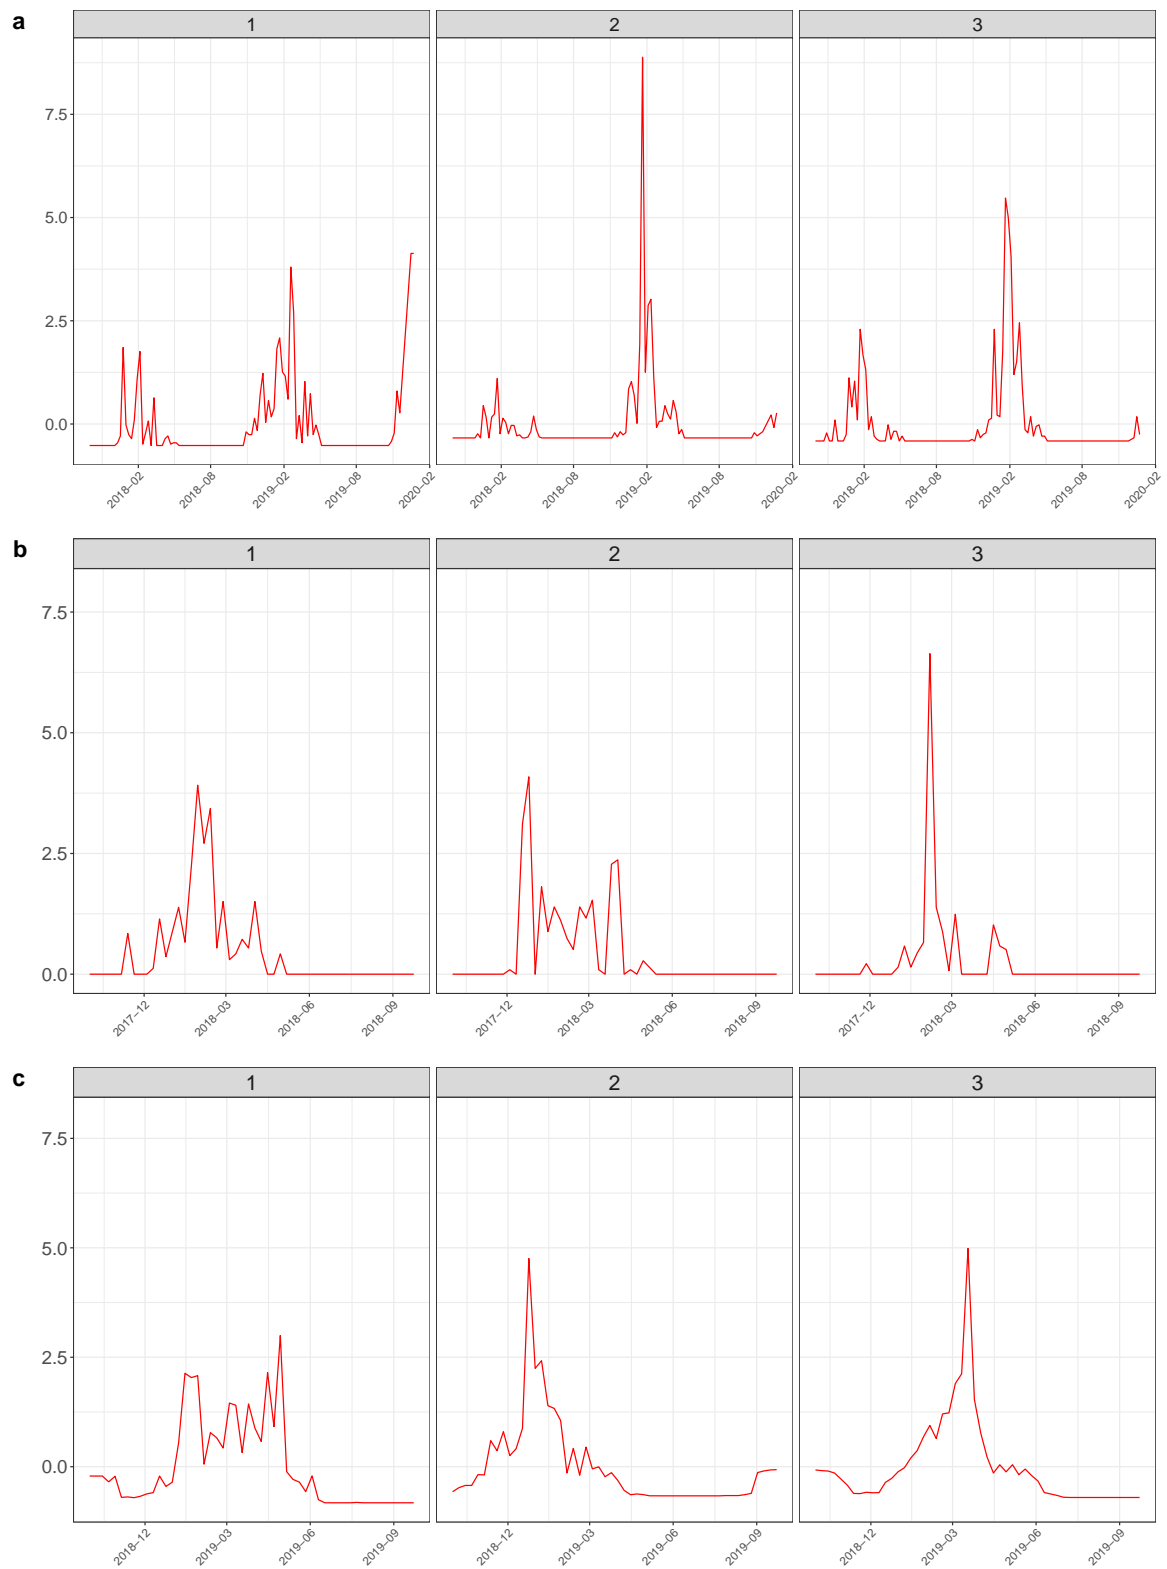

**Figure S3.** Centroid time series of the clusters obtained for a) the full series, b) 2017-2018 and c) 2018-2019. Values are normalized.

**Table S3.** Clustering comparisons by means of dissimilarity measures.

| comparison | Dissimilarity measure |           |               |         | Rand  | VI    |
|------------|-----------------------|-----------|---------------|---------|-------|-------|
|            | euclidean             | manhattan | comemberships | syndiff |       |       |
| Full-1718  | 12.649                | 160       | 101.094       | 5110    | 0.503 | 1.825 |
| Full-1819  | 11.662                | 136       | 99.94         | 4994    | 0.492 | 1.583 |
| 1718-1819  | 13.191                | 174       | 101.232       | 5124    | 0.505 | 1.851 |

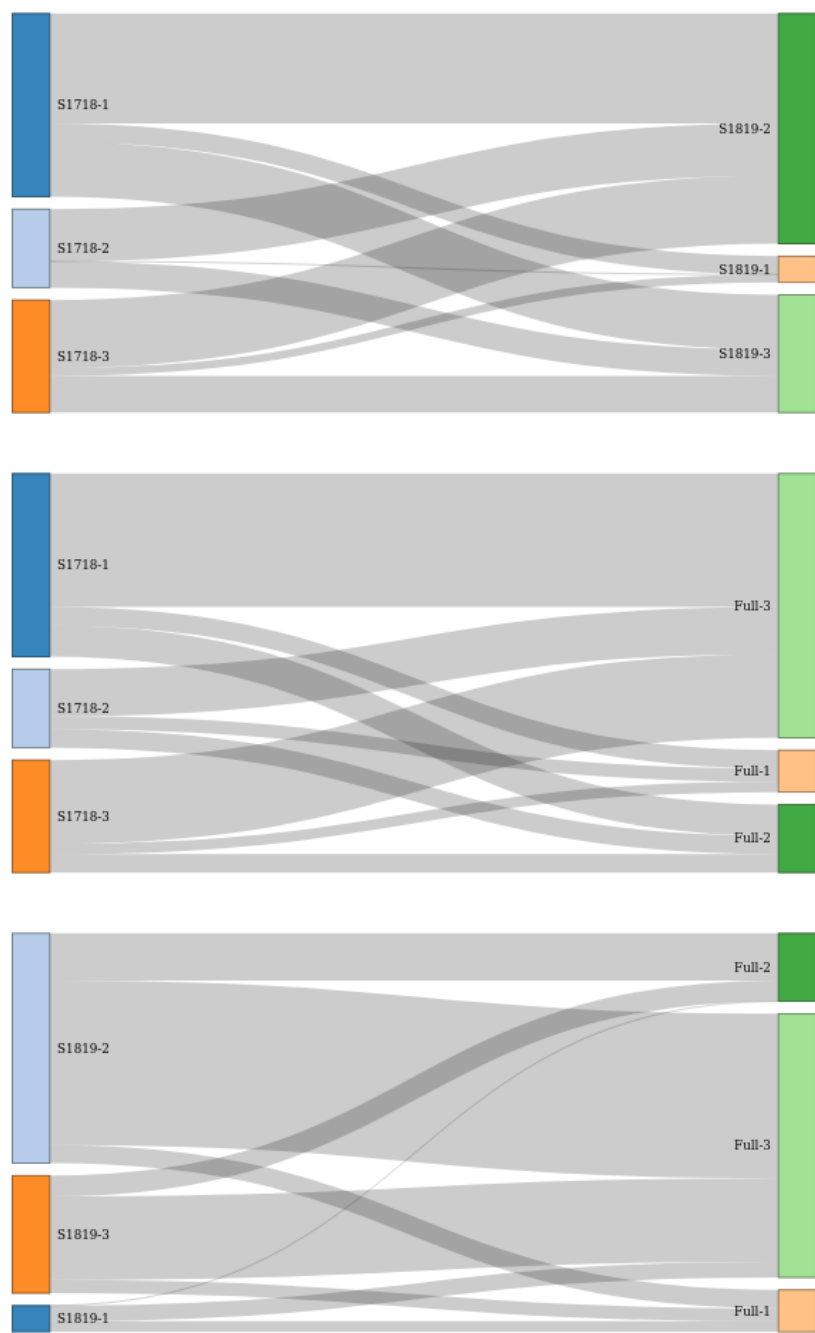

**Figure S4.** Clusters flow among different periods.

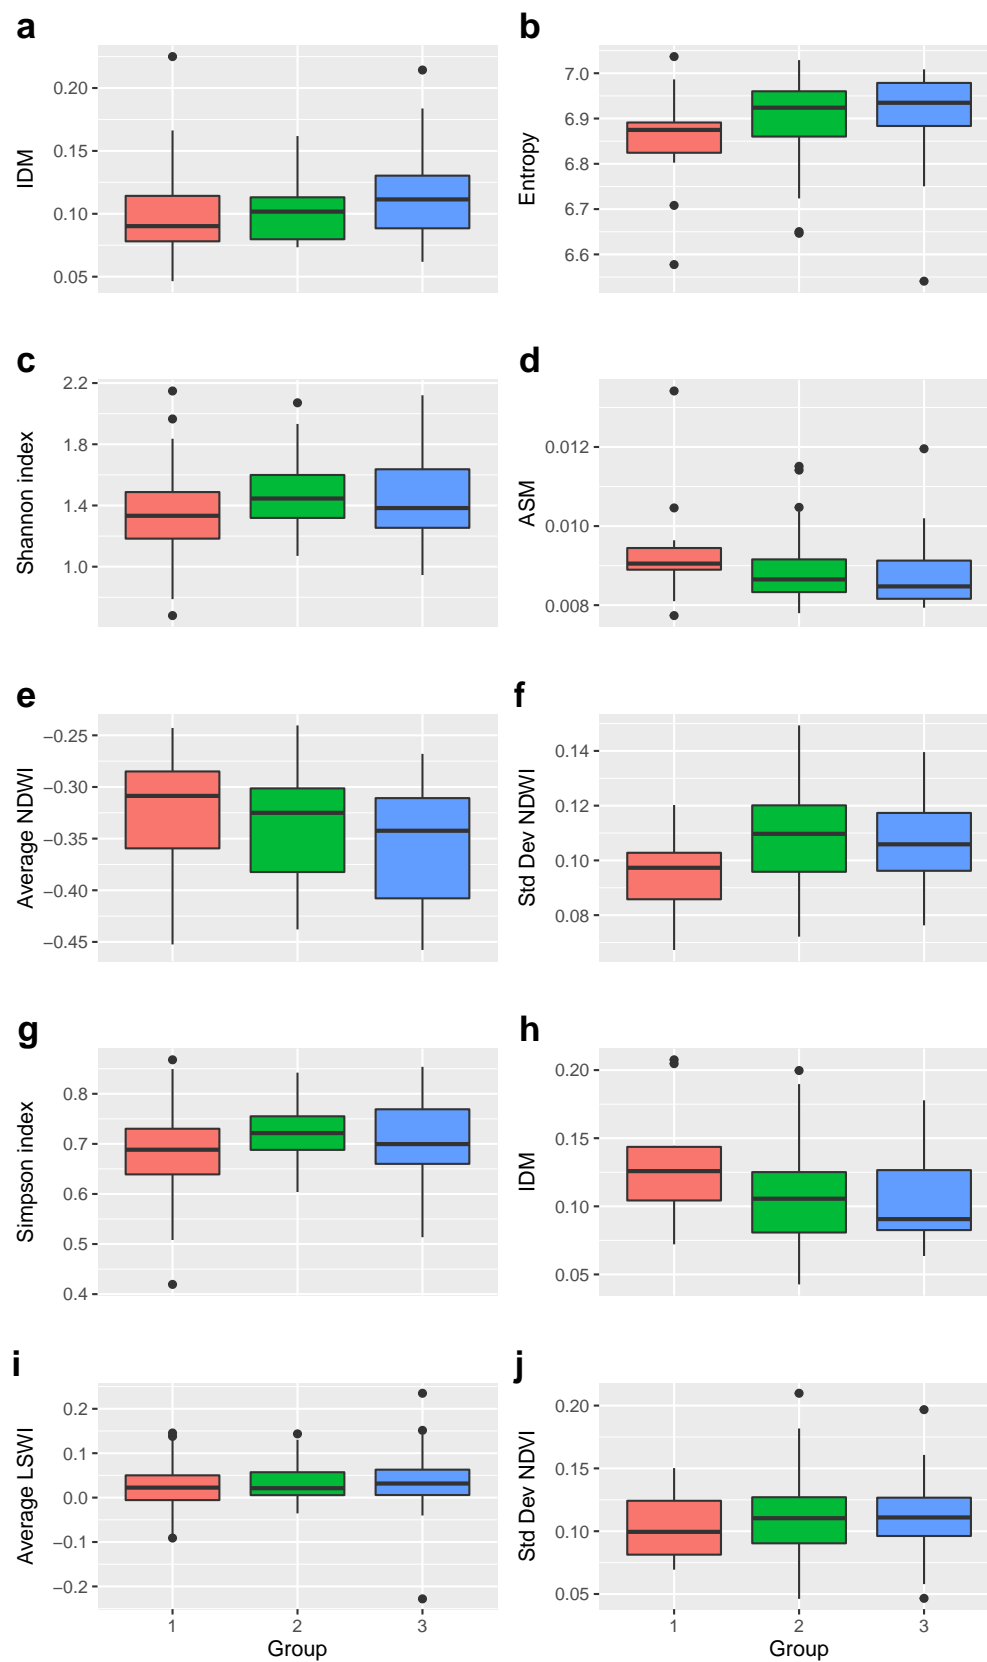

**Figure S5.** Comparison clusters in terms of the five most important variables for models fitted with 50 m radio buffer areas in 2017-2018 (a, c, e, g, i) and 2018-2019 (b, d, f, h, j). References: IDM, inverse difference moment; ASM, angular second moment; NDWI, normalized difference water index; LSWI, land surface water index; NDVI, normalized difference vegetation index; Std Dev, standard deviation.

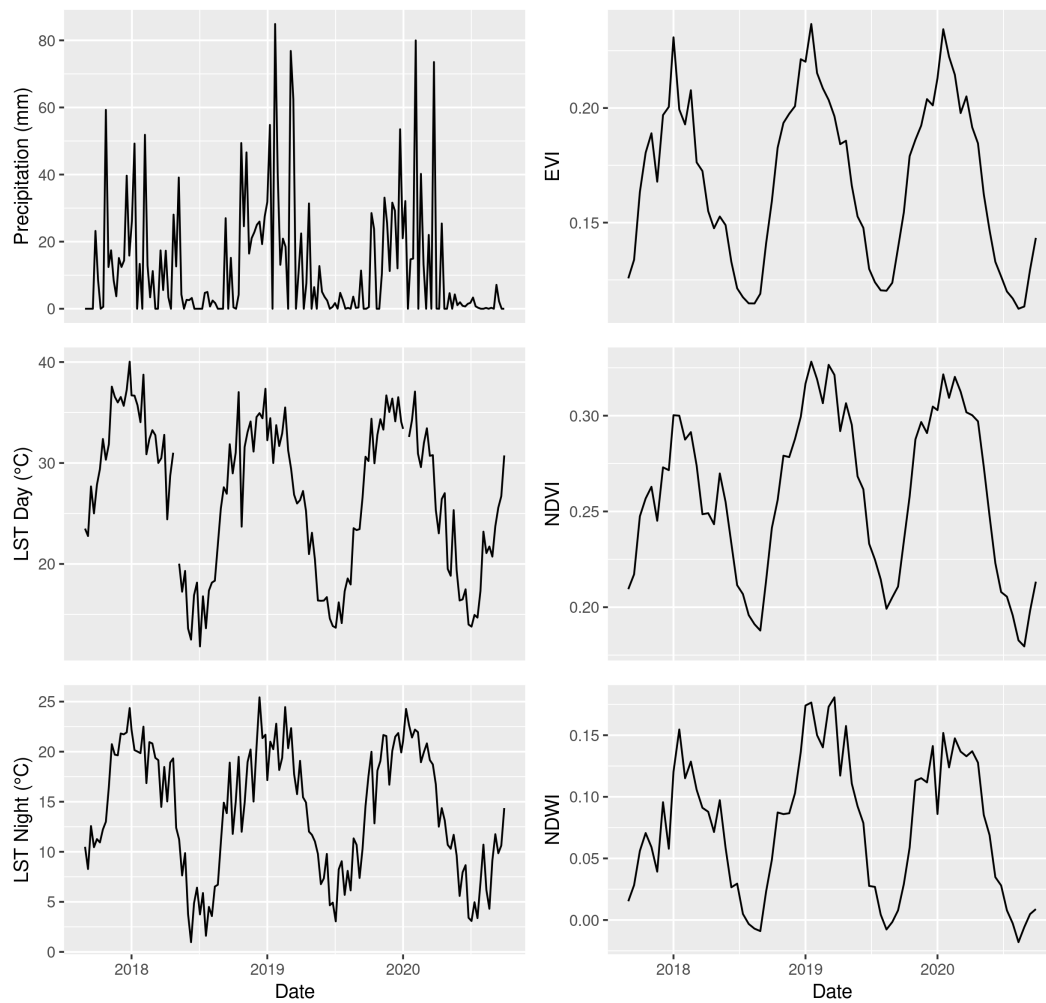

**Figure S6.** Time series of precipitation, LST day and night, EVI, NDVI and NDWI for the period 2017-2020 in Córdoba city, Argentina.

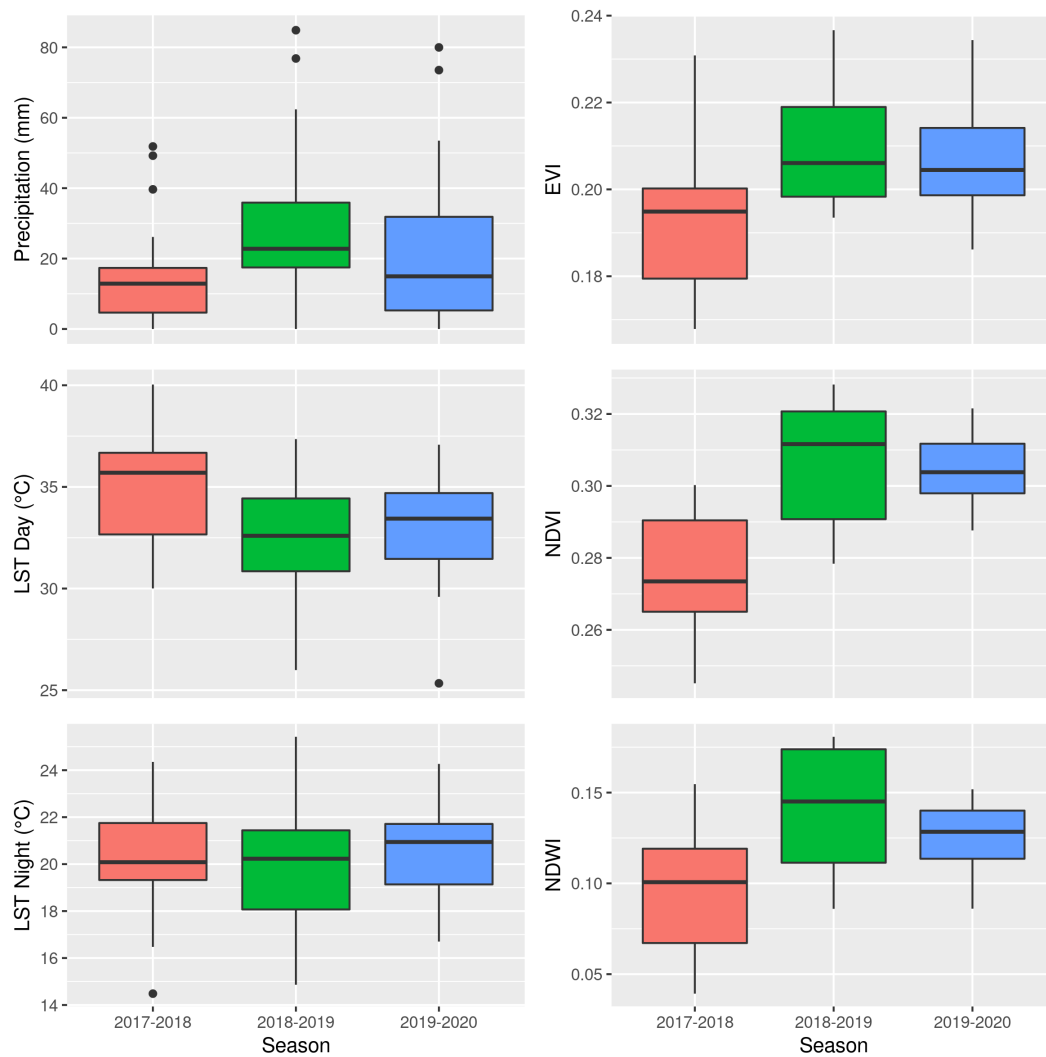

**Figure S7.** Comparison of precipitation, LST day and night, EVI, NDVI and NDWI for the core mosquito season (November to March) in the periods 2017-2018 and 2018-2019 and 2019-2020 in Córdoba city, Argentina.
